# Supplementary material
Source: PubMed Central journal article supplement (PMC6339547)
Supplement: AET2-3-6-s001.pdf [file AET2-3-6-s001.pdf]

## Data Supplement S1: Grit-S Scale<sup>11,19</sup>

1. New ideas and projects sometimes distract me from previous ones.
  - Very much like me
  - Mostly like me
  - Somewhat like me
  - Not much like me
  - Not like me at all
2. Setbacks don't discourage me.
  - Very much like me
  - Mostly like me
  - Somewhat like me
  - Not much like me
  - Not like me at all
3. I have been obsessed with a certain idea or project for a short time but later lost interest.
  - Very much like me
  - Mostly like me
  - Somewhat like me
  - Not much like me
  - Not like me at all
4. I am a hard worker.
  - Very much like me
  - Mostly like me
  - Somewhat like me
  - Not much like me
  - Not like me at all
5. I often set a goal but later choose to pursue a different one.
  - Very much like me
  - Mostly like me
  - Somewhat like me
  - Not much like me
  - Not like me at all
6. I have difficulty maintaining my focus on projects that take more than a few months to complete.
  - Very much like me
  - Mostly like me
  - Somewhat like me
  - Not much like me
  - Not like me at all
7. I finish whatever I begin.
  - Very much like me
  - Mostly like me
  - Somewhat like me
  - Not much like me
  - Not like me at all

8. I am diligent.
- Very much like me
  - Mostly like me
  - Somewhat like me
  - Not much like me
  - Not like me at all

Scoring: Add up the points and divide by 8. Five is the maximum and is the most gritty.

1. Questions 2, 4, 7, 8 get the following points:

5 = Very much like me

4 = Mostly like me

3 = Somewhat like me

2 = Not much like me

1 = Not like me at all

2. Questions 1, 3, 5, 6 get the following points:

1 = Very much like me

2 = Mostly like me

3 = Somewhat like me

4 = Not much like me

5 = Not like me at all
